# Supplementary material for: On the energetics of bound charge-transfer states in organic photovoltaics
Source: Royal Society of Chemistry journal article supplement (doi:10.1039/c7ta01190c), 2017-01-01
Supplement: c7ta01190c1.pdf [file c7ta01190c1.pdf]

## Supplementary Information for

# On the Energetics of Bound Charge-Transfer States in Organic Photovoltaics

*Jiangbin Zhang<sup>1</sup>, Andreas C. Jakowetz<sup>1</sup>, Guangru Li<sup>1</sup>, Dawei Di<sup>1</sup>, S. Matthew Menke<sup>1</sup>,  
Akshay Rao<sup>1</sup>, Richard H. Friend<sup>1</sup>, Artem A. Bakulin<sup>1,2</sup>*

<sup>1</sup> Cavendish Laboratory, University of Cambridge, JJ Thomson Avenue, Cambridge CB3 0HE, United Kingdom;

<sup>2</sup> Department of Chemistry, Imperial College London, London SW7 2AZ, United Kingdom;

### KEYWORDS:

Organic Photovoltaics, Binding Energy, Activation Energy, Arrhenius Plot, Driving Energy, Charge Generation, Pump-Push Photocurrent Spectroscopy, Charge Delocalization, Device Characterization, Polymer, Fullerene, Ultrafast Spectroscopy;

### LIST:

**Figure S1** UV-Vis absorption of films of MDMO-PPV:fullerene derivatives.

**Figure S2** PPP response at room temperature (300 K).

**Figure S3** Typical raw PPP kinetics without background removal in MDMO-PPV:bPCBM(1:1) device. The background signal is assigned to long-lived trapped states.

**Figure S4** Full dataset of pump-push photocurrent spectroscopy.

**Table S1** Key device parameters.

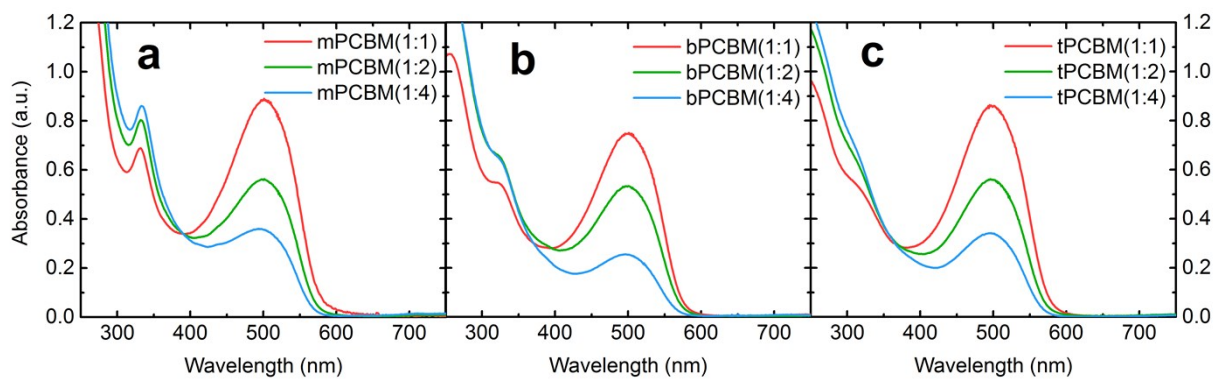

**Figure S1** UV-Vis absorption of films of MDMO-PPV:fullerene derivatives (a) mPCBM (b) bPCBM and (c) tPCBM with blend ratios of 1:1, 1:2 and 1:4.

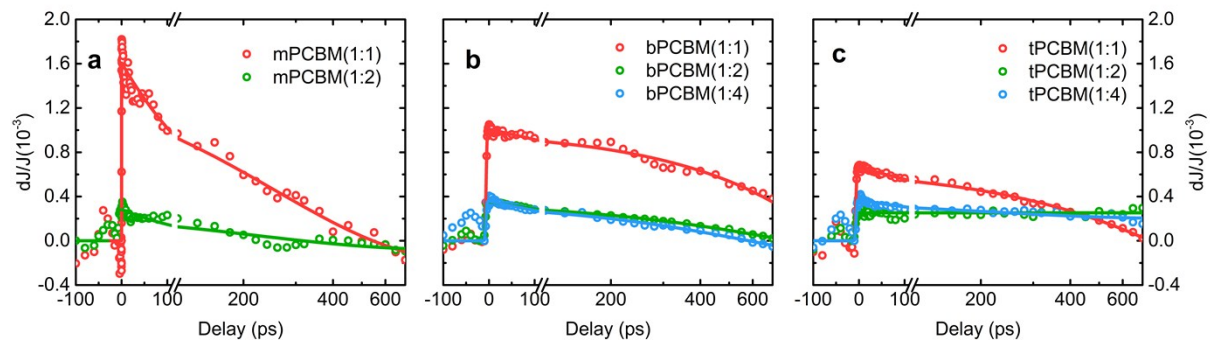

**Figure S2** PPP response at room temperature (300 K). (a) MDMO-PPV:mPCBM (b) MDMO-PPV:bPCBM and (c) MDMO-PPV:tPCBM.

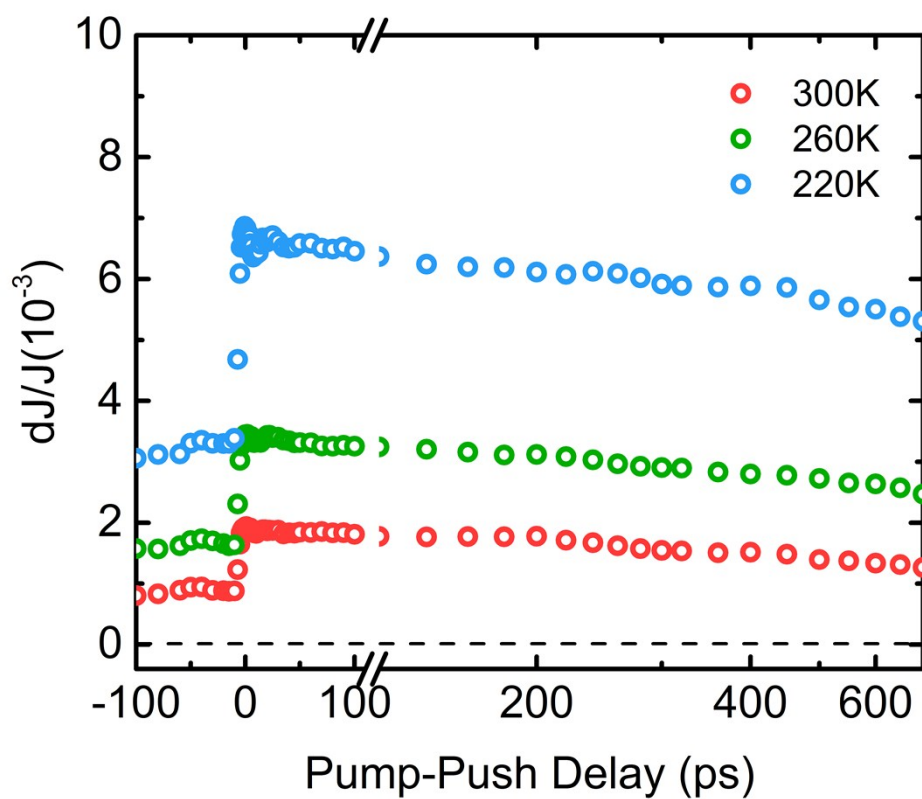

**Figure S3** Typical Raw PPP kinetics without background removal in MDMO-PPV:bPCBM(1:1) device. The background signal is assigned to long-lived trapped states and multi-photon excitations.

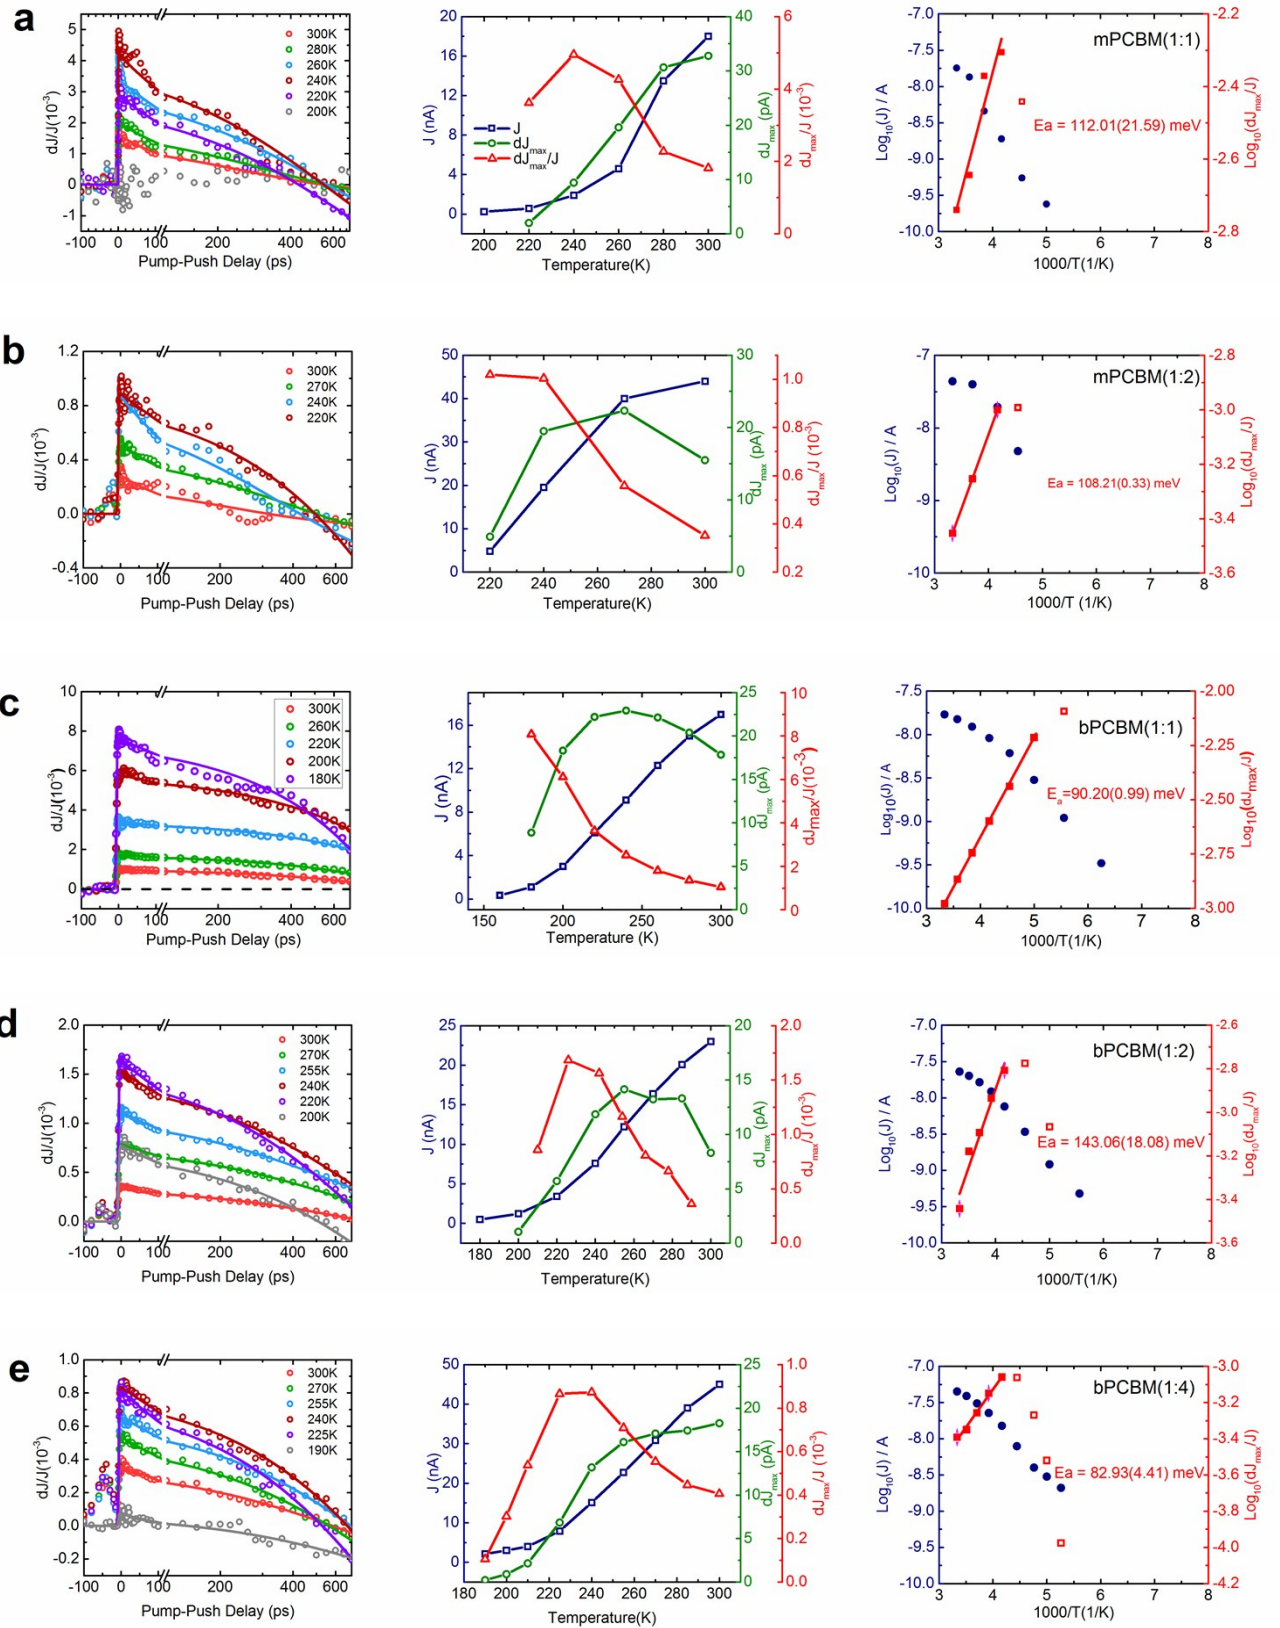

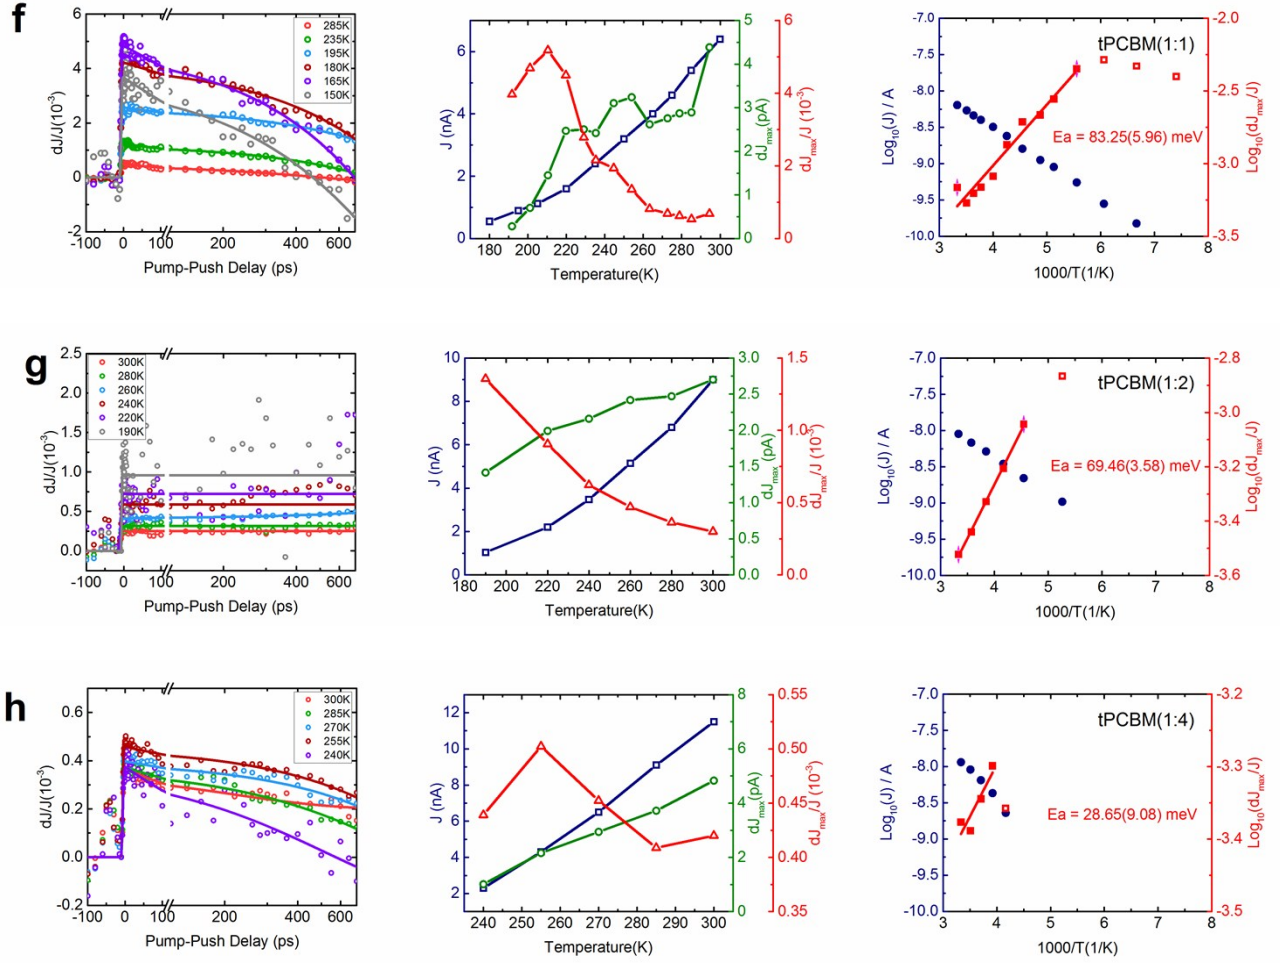

**Figure S4** Full dataset of (i) the PPP dynamics in different devices, (ii) temperature dependence of  $J$ ,  $dJ_{max}$  and  $dJ_{max}/J$ , and (iii) Arrhenius plots of  $J$  and  $dJ_{max}/J$ . (a) mPCBM with D-A ratio of 1:1 (b) mPCBM with D-A ratio of 1:2 (d) bPCBM with D-A ratio of 1:2 (e) bPCBM with D-A ratio of 1:4 (f) tPCBM with D-A ratio of 1:1 (g) tPCBM with D-A ratio of 1:2 (h) tPCBM with D-A ratio of 1:4



**Table S1** Key device parameters of MDMO-PPV as the donor and three fullerene derivatives (mPCBM, bPCBM and tPCBM) as the acceptors with blend ratios of 1:1, 1:2 and 1:4.

| <i>Acceptor</i>     | <i>1:1</i>                       | <i>1:2</i> | <i>1:4</i> |
|---------------------|----------------------------------|------------|------------|
| <b><i>mPCBM</i></b> | Voc/(V) = 0.91                   | Voc = 0.87 | Voc = 0.84 |
|                     | Jsc/(mA/cm <sup>2</sup> ) = 1.61 | Jsc = 3.62 | Jsc = 4.82 |
|                     | FF=35%                           | FF=44%     | FF=51%     |
|                     | PCE=0.51%                        | PCE=1.39%  | PCE=2.10%  |
| <b><i>bPCBM</i></b> | Voc = 1.00                       | Voc = 0.98 | Voc=0.98   |
|                     | Jsc = 1.01                       | Jsc = 1.54 | Jsc=2.36   |
|                     | FF=29%                           | FF=32%     | FF=36%     |
|                     | PCE=0.29%                        | PCE=0.49%  | PCE=0.83%  |
| <b><i>tPCBM</i></b> | Voc = 1.01                       | *          | Voc = 1.01 |
|                     | Jsc = 0.33                       |            | Jsc = 0.76 |
|                     | FF=25%                           |            | FF=29%     |
|                     | PCE=0.08%                        |            | PCE=0.22%  |

\*Even though the tPCBM/1:2 data is absent, from the trend of the data, we can still estimate Voc ~ 1.01V, Jsc ~ 0.5 mA/cm<sup>2</sup>, FF ~ 27% and PCE ~ 0.15%.
